# Supplementary material for: Detection of genomic structural variations in Guizhou indigenous pigs and the comparison with other breeds
Source: PubMed Central journal article supplement (PMC5860705; doi:10.1371/journal.pone.0194282), 2018-03-20

S1 Fig. Representative gel images for the confirmation of SVs in GZP pig.

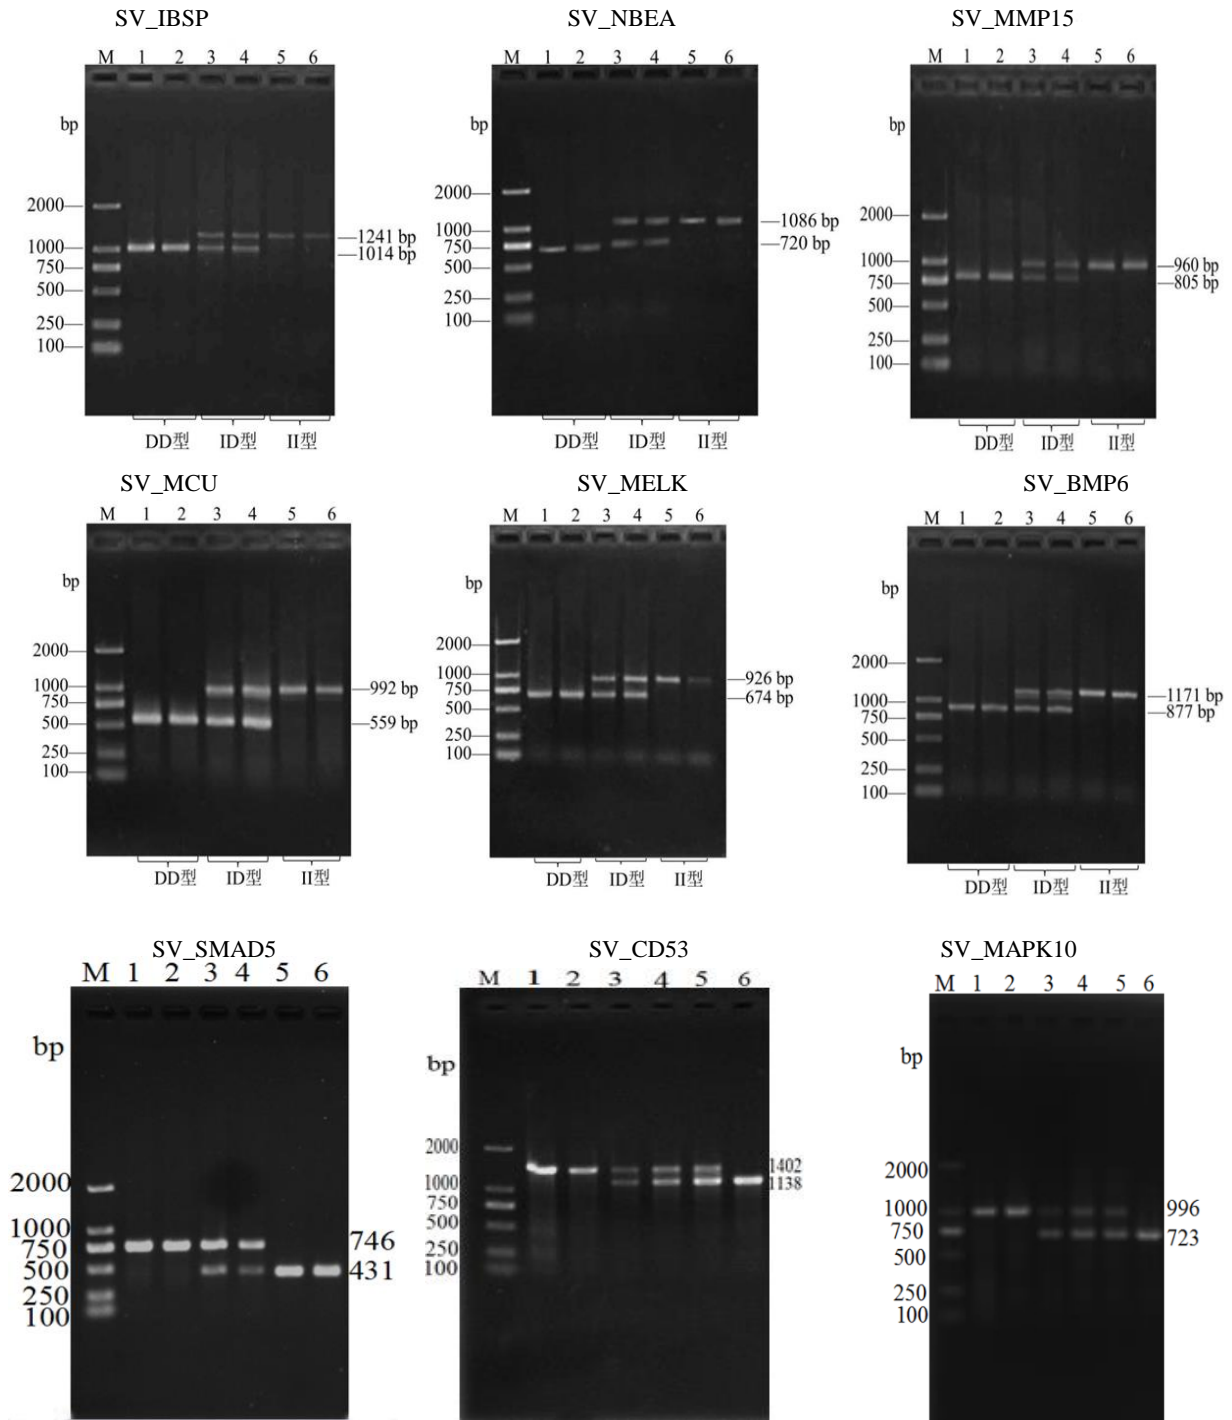

SV\_NSUN

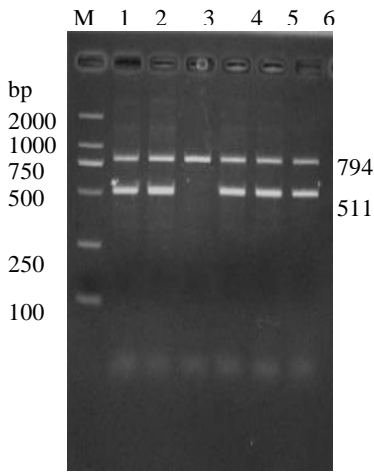

SV\_FRMD1

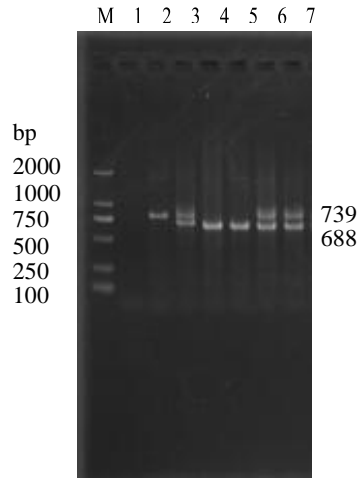

SV\_TMEM131

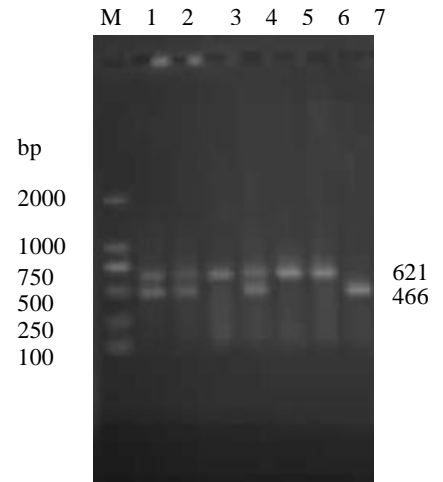

SV\_HMGCS2

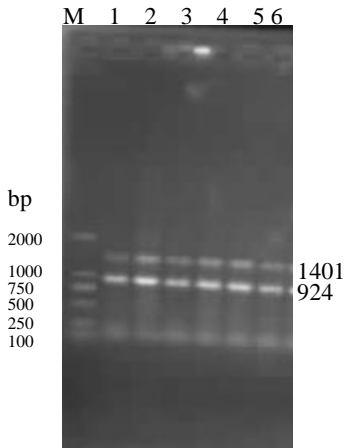

SV\_JAK2

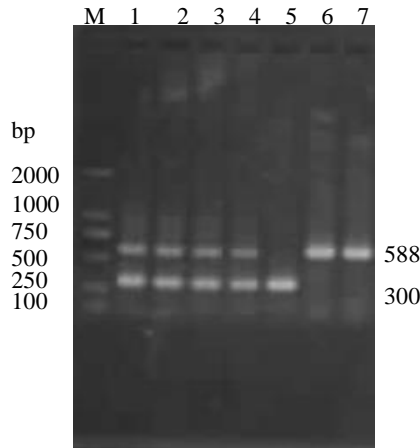

SV\_LHFPL2

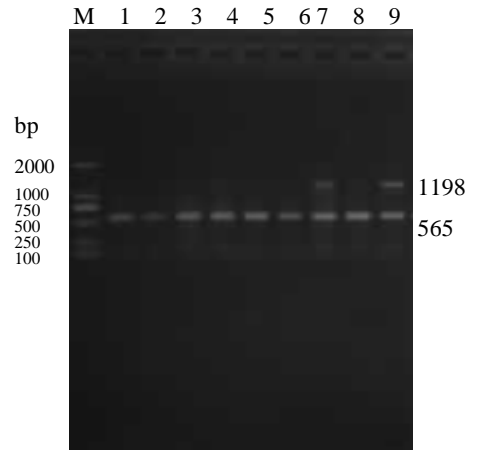

SV\_ST6GAL2

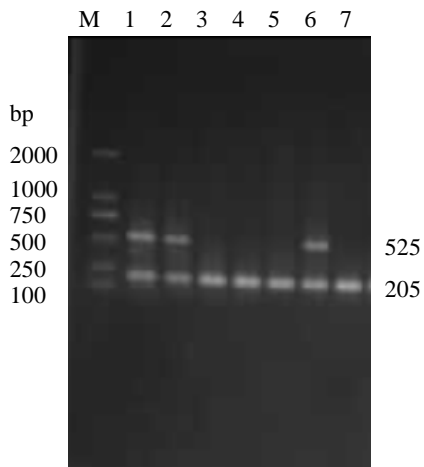

SV\_SERPINI1

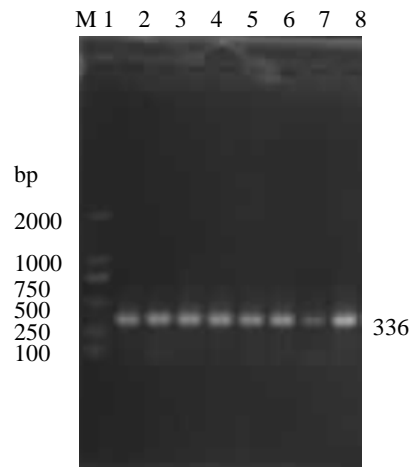

SV\_SH3P5

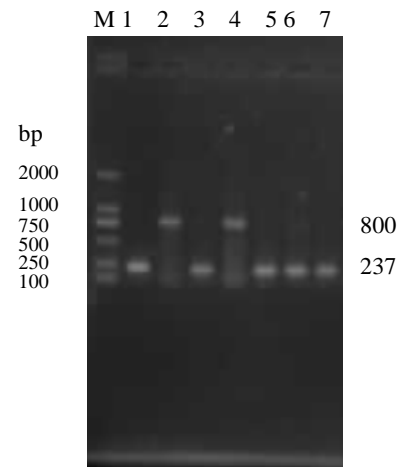

SV\_TMEM182

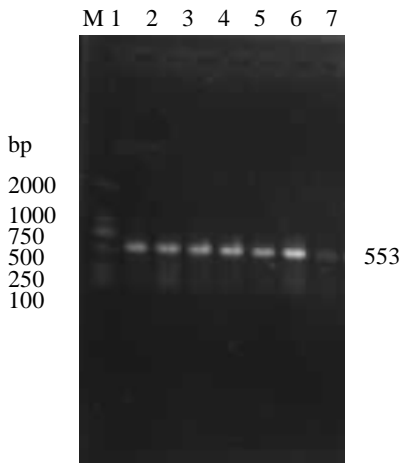

SV\_REPS2

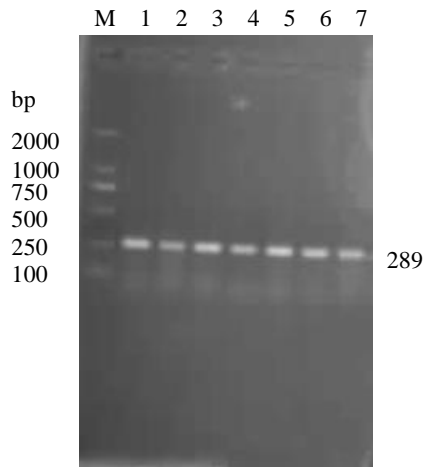

SV\_PPEF1

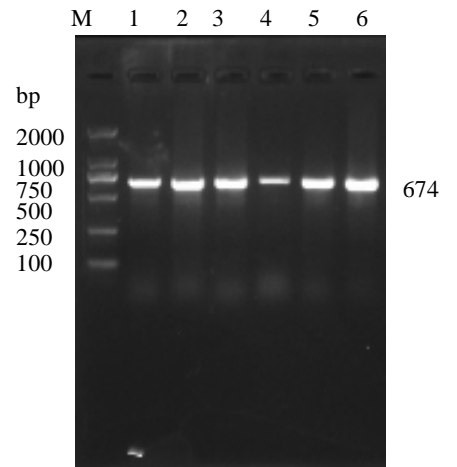

SV\_FRMD4B

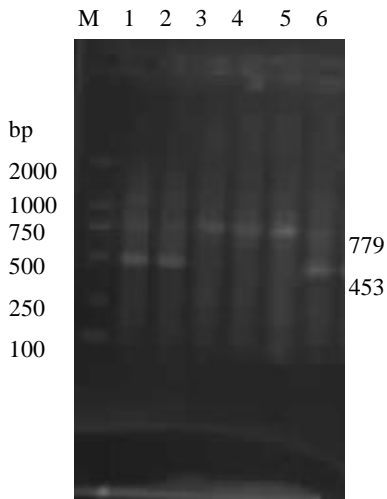

SV\_LBP

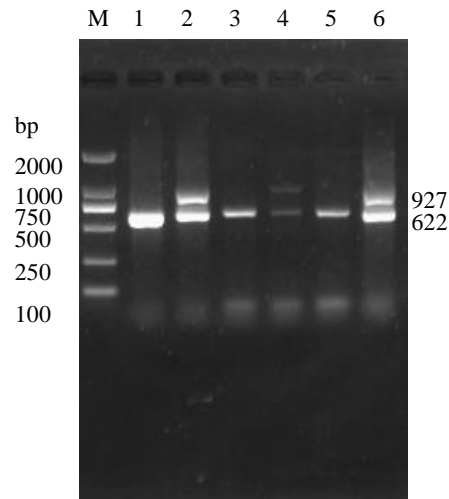

SV\_GDF5

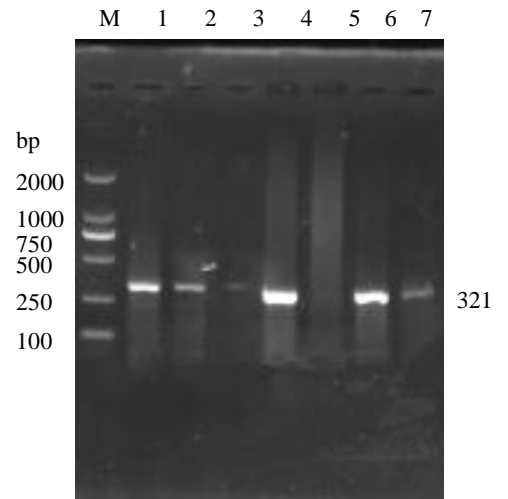

SV\_THOC2

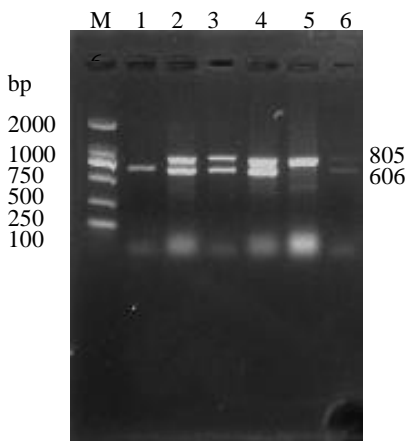

SV\_NMT2

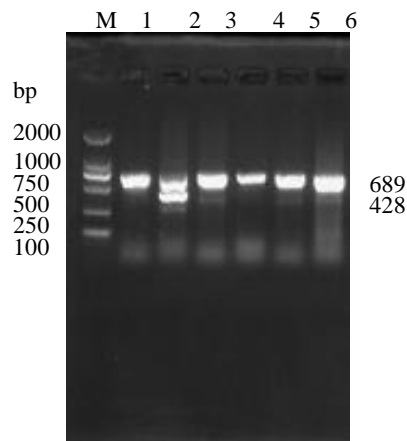

SV\_NINL

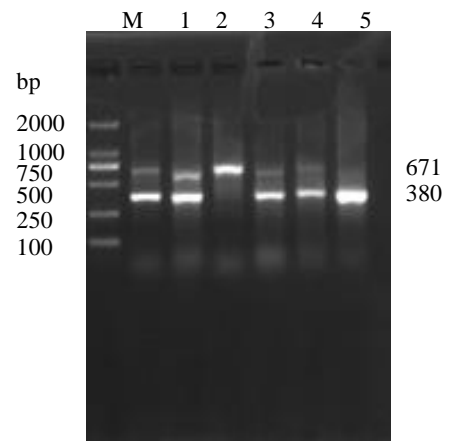

SV\_ATRX

M 1 2 3 4 5 6

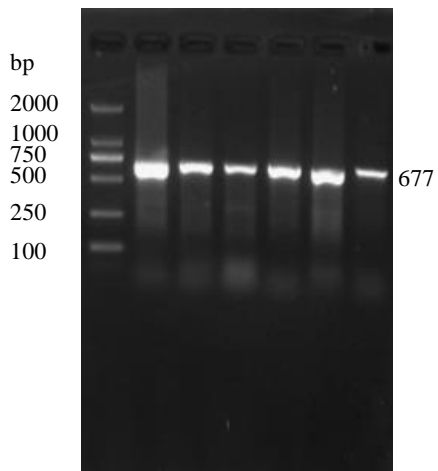

SV\_PLA2G2D

M 1 2 3 4 5 6

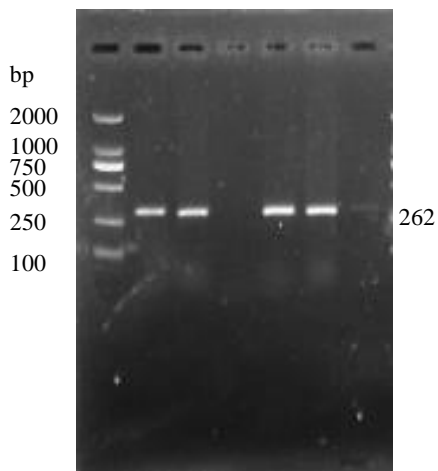

SV\_ZDHHC15

M 1 2 3 4 5 6

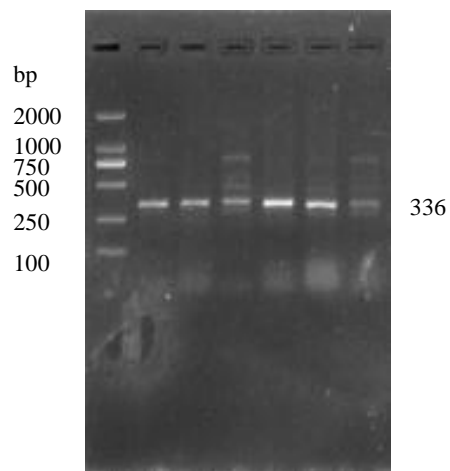

SV\_NAMPT

M 1 2 3 4 5 6

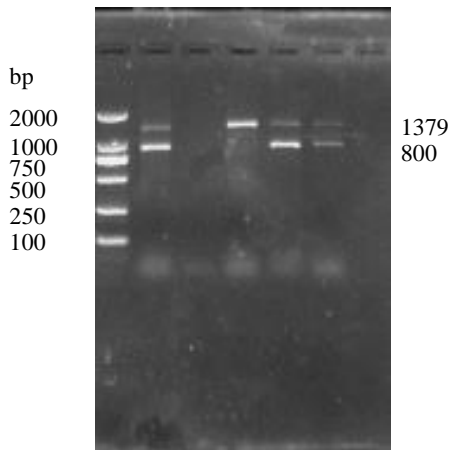

SV\_ANAPC10

M 1 2 3 4 5

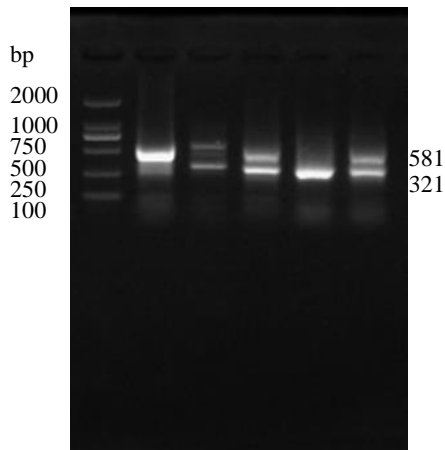

SV\_ADCY2

M 1 2 3 4 5

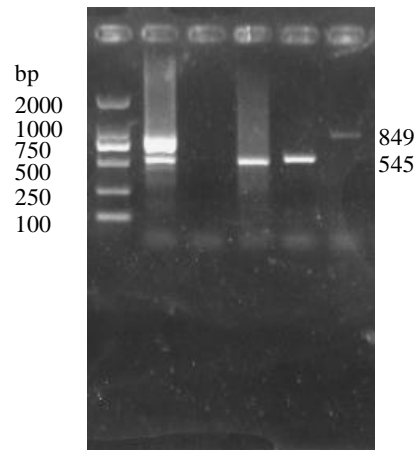

SV\_AR

M 1 2 3 4 5 6

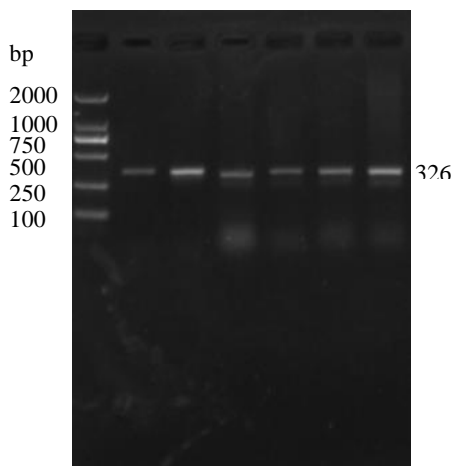

SV\_GHR

M 1 2 3 4 5 6

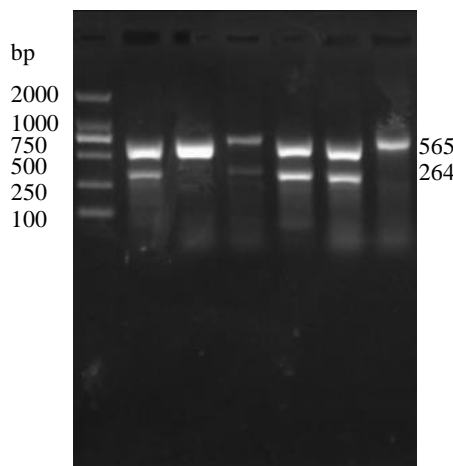

SV\_IGF1F

M 1 2 3 4 5 6

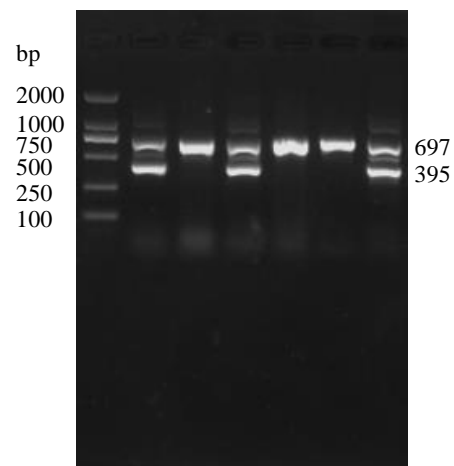

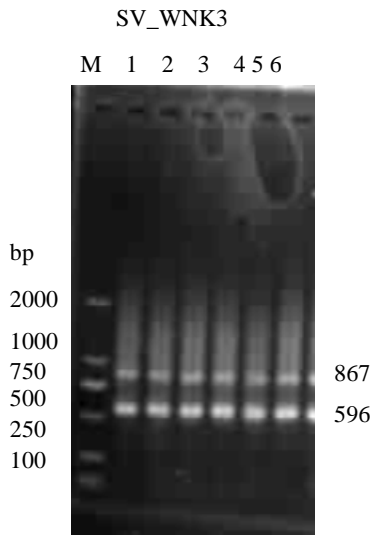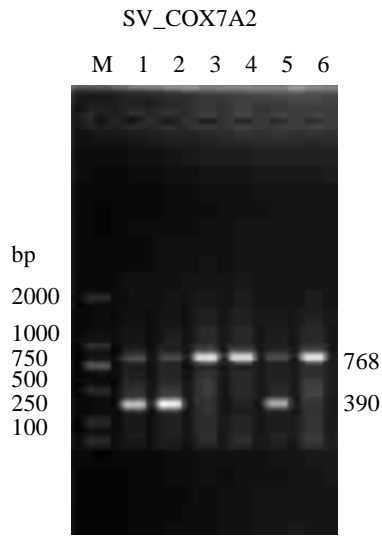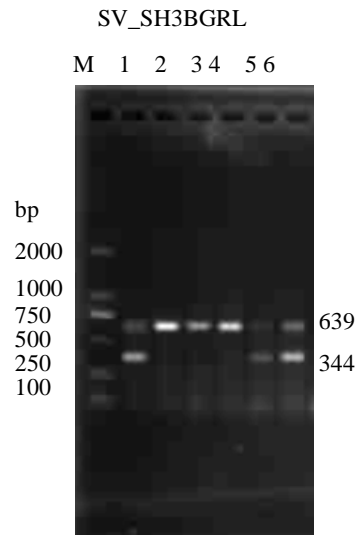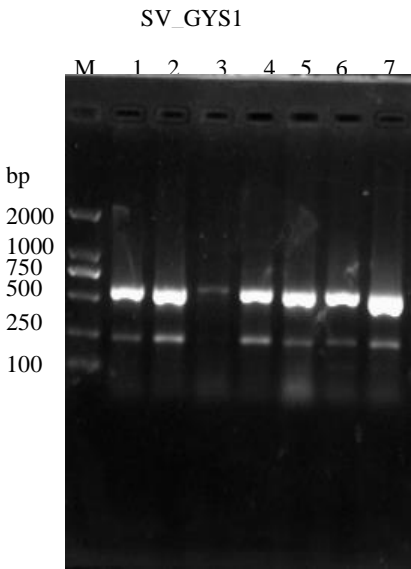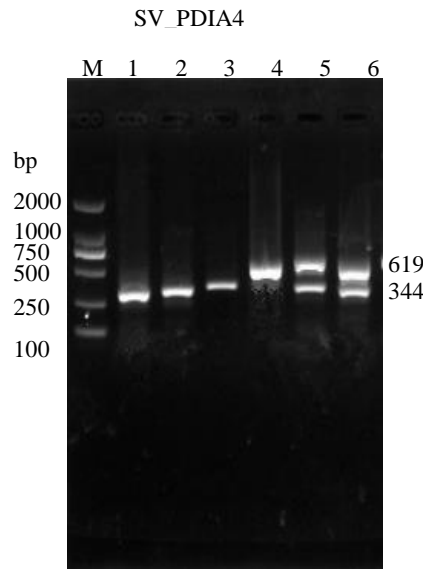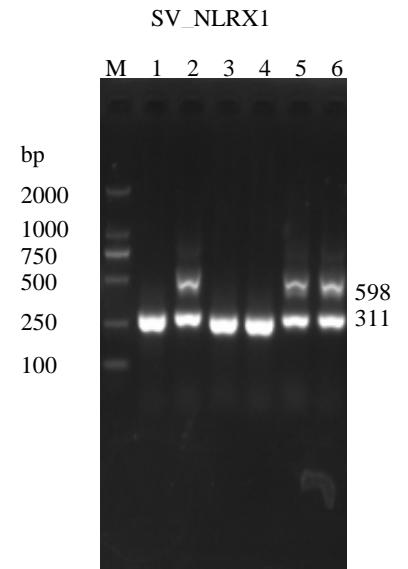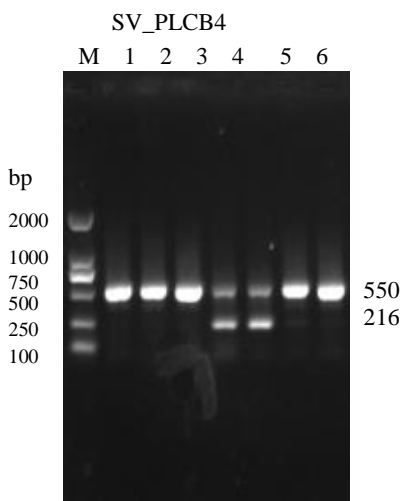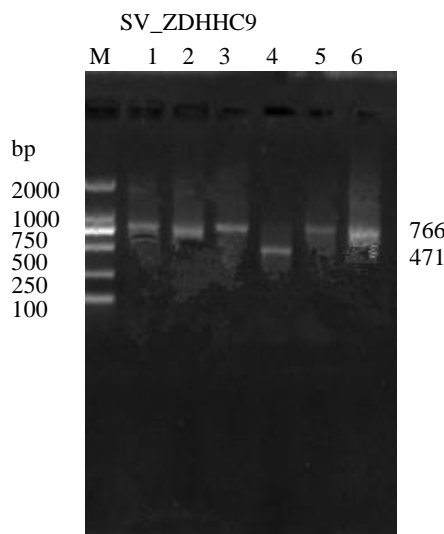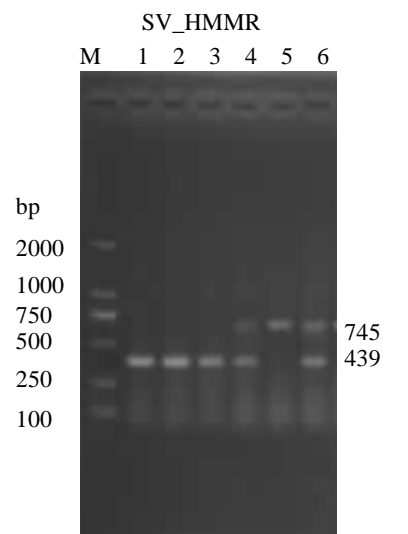

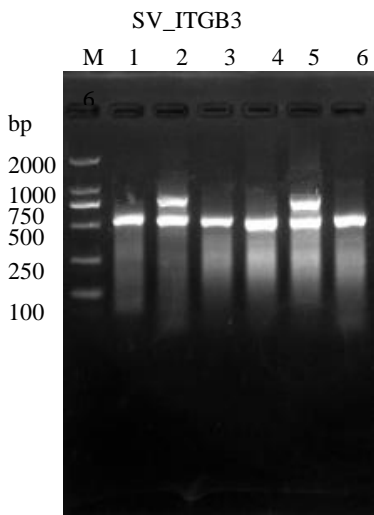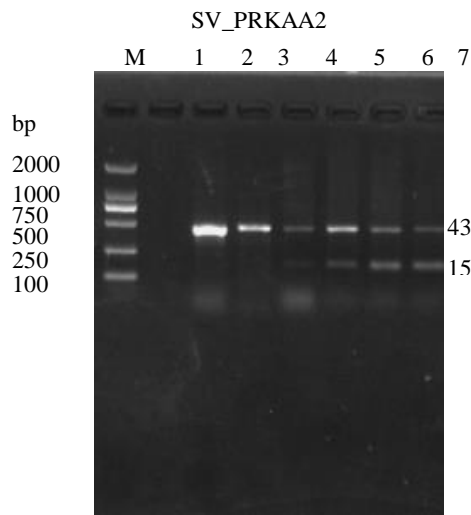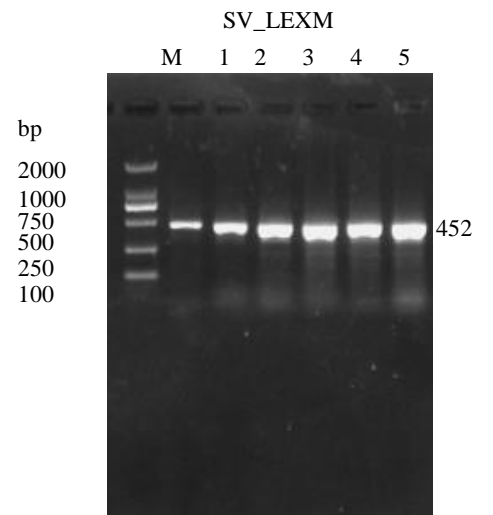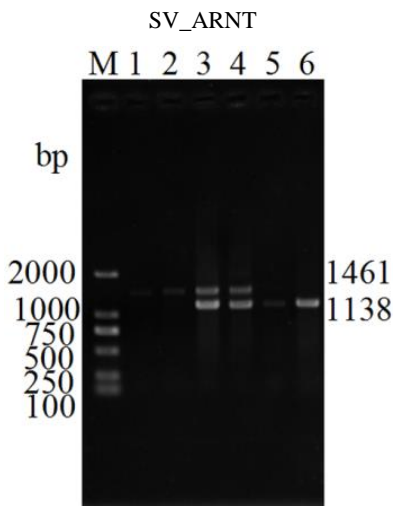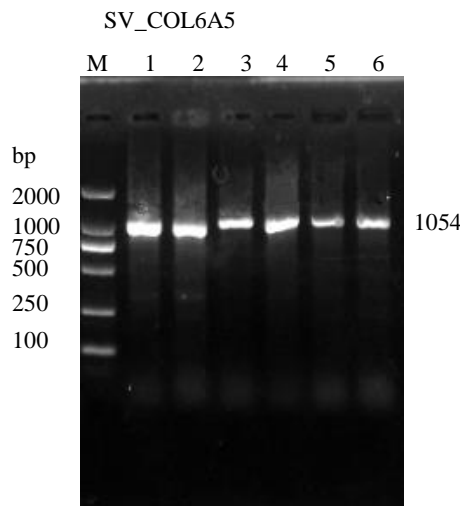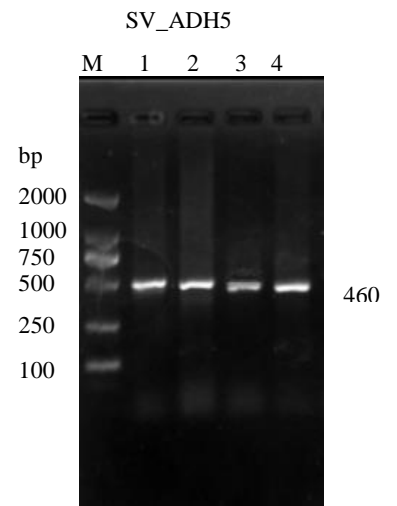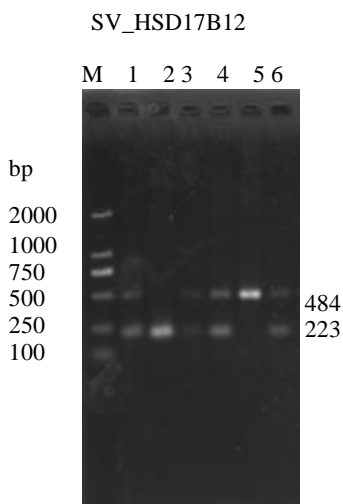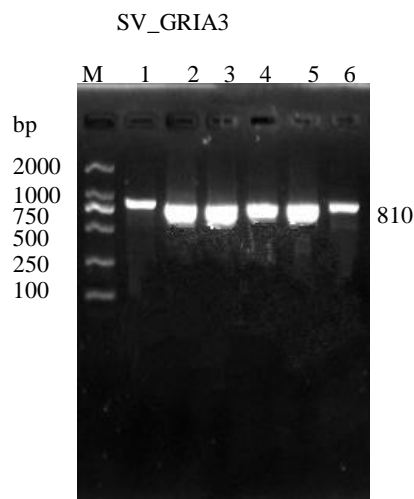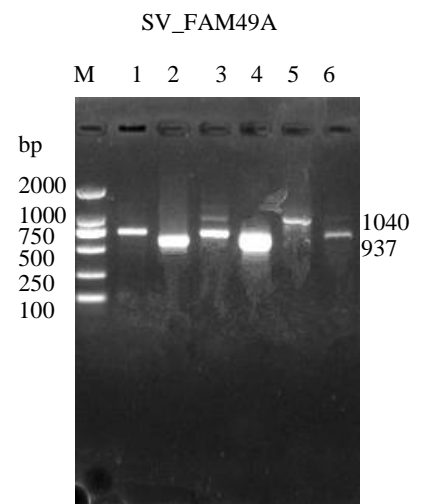

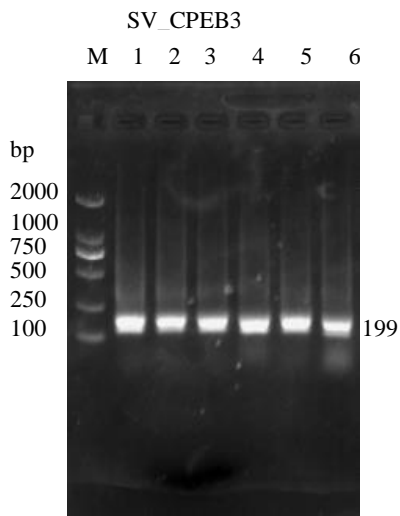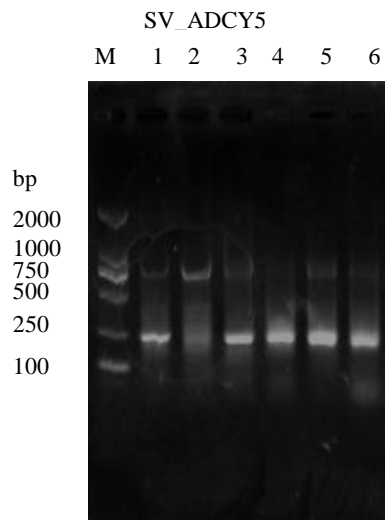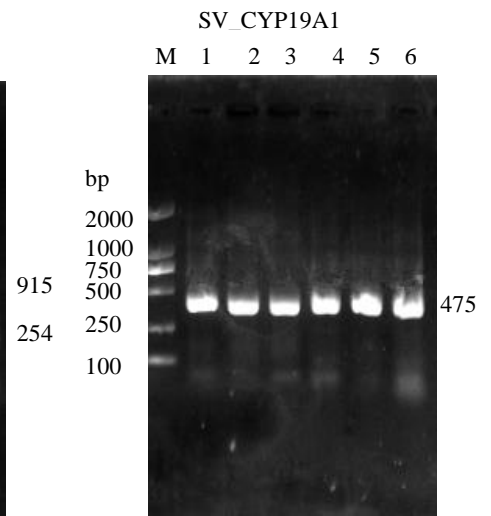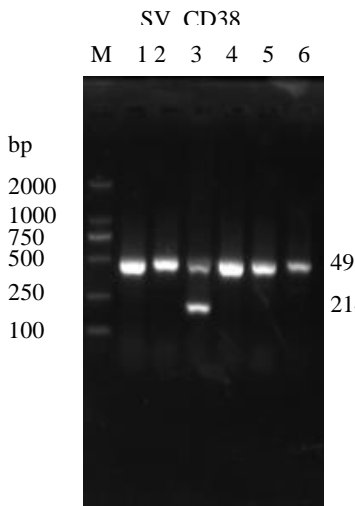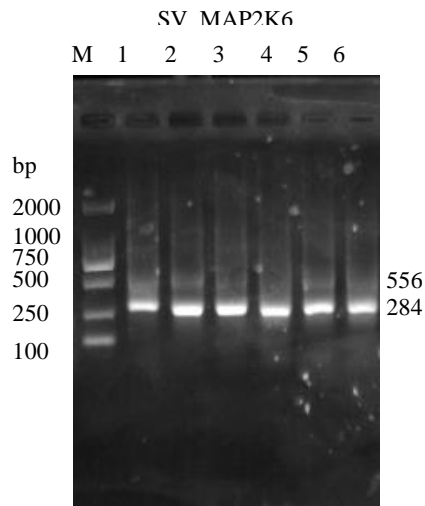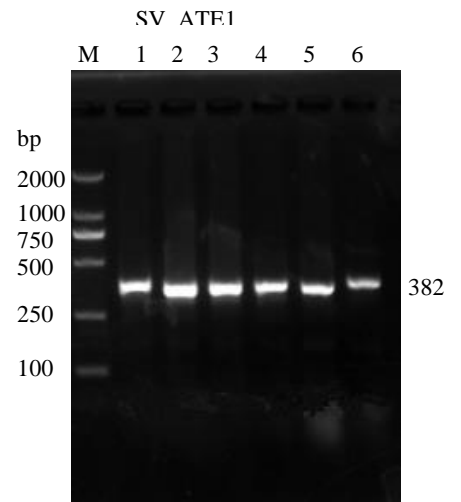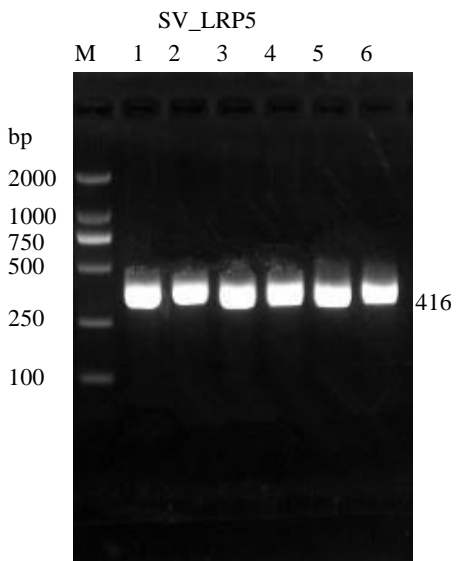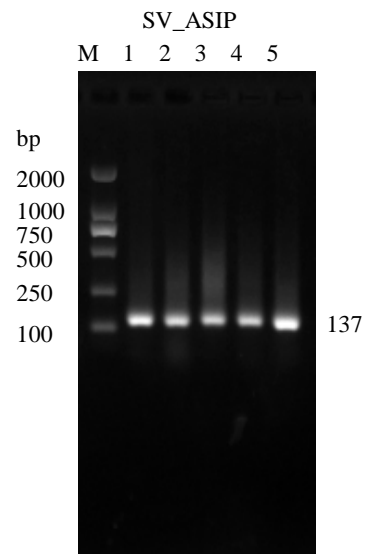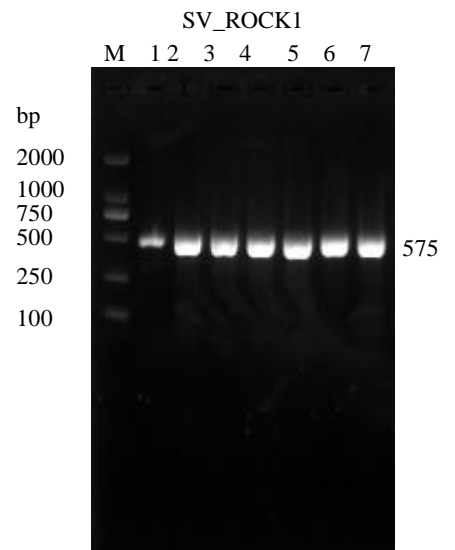

SV RSPO2

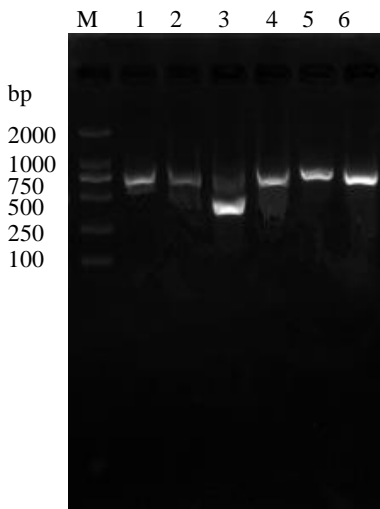

SV KLF3

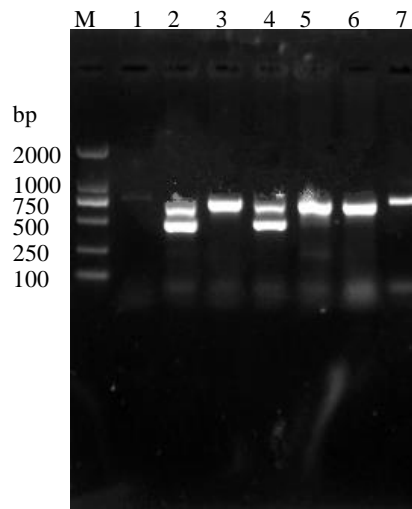

SV WNT2

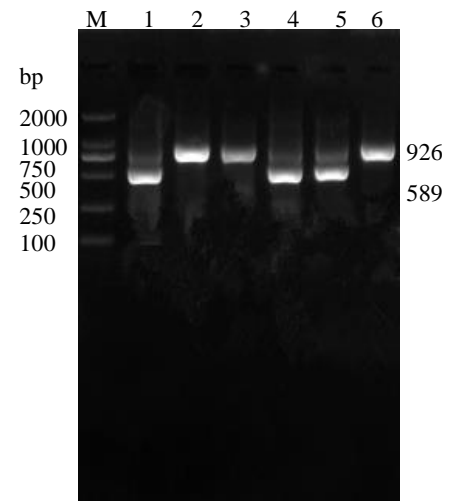

SV ACAT2

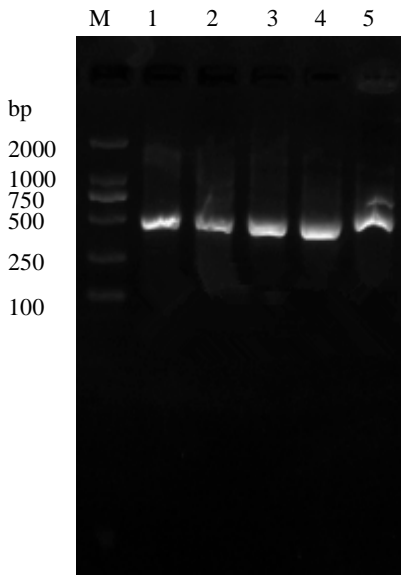

SV ACSL3

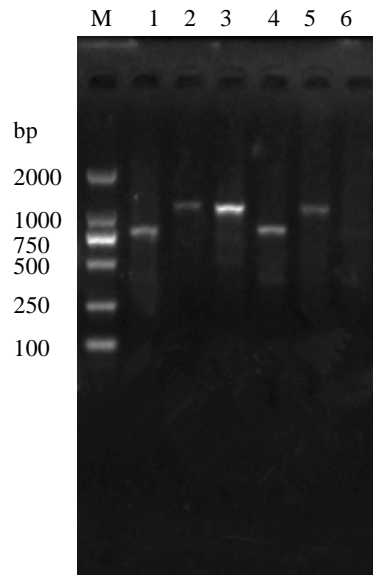

SV HADH

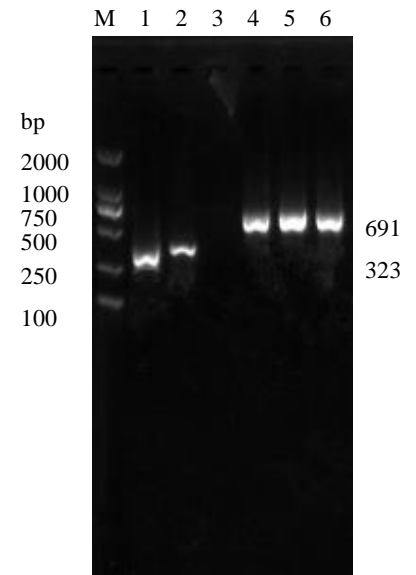

SV APOD

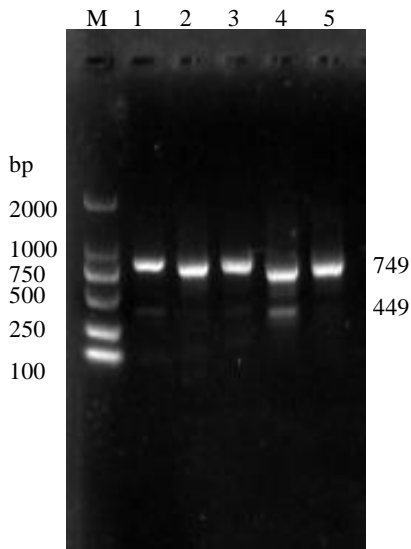

SV GSK3B

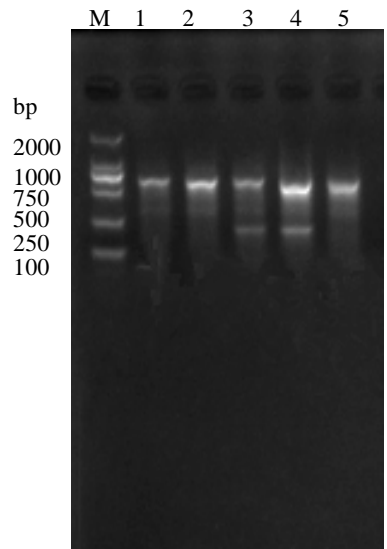

SV AKT3

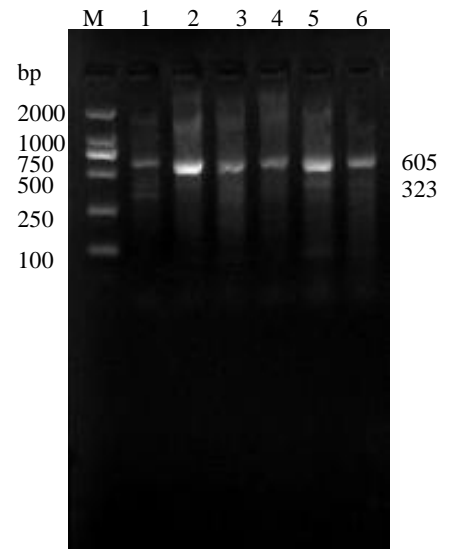



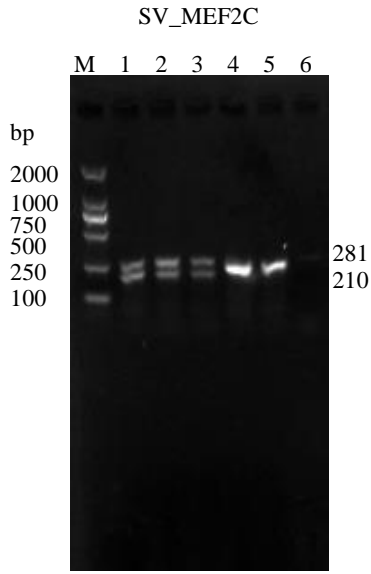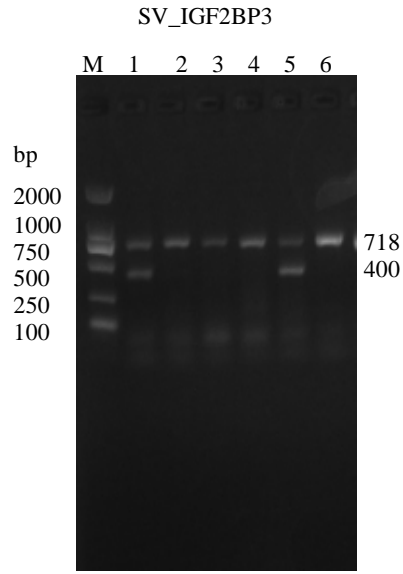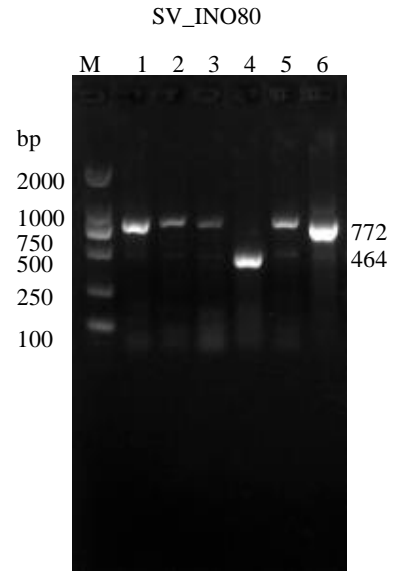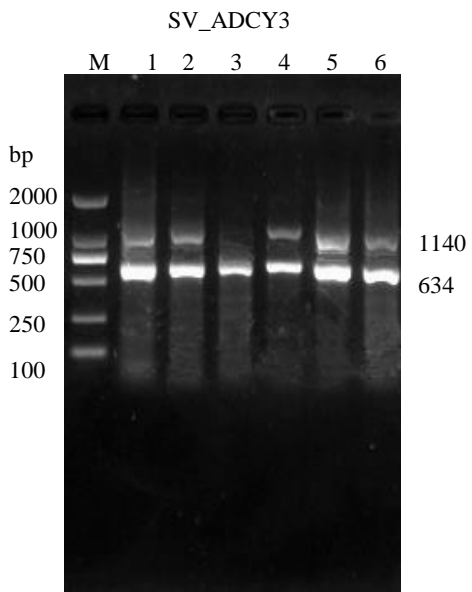

Supplement: pone.0194282.s001.pdf [file pone.0194282.s001.pdf]
